# Supplementary material
Source: publisher site journal article supplement (doi:10.3762/bjoc.2.20)

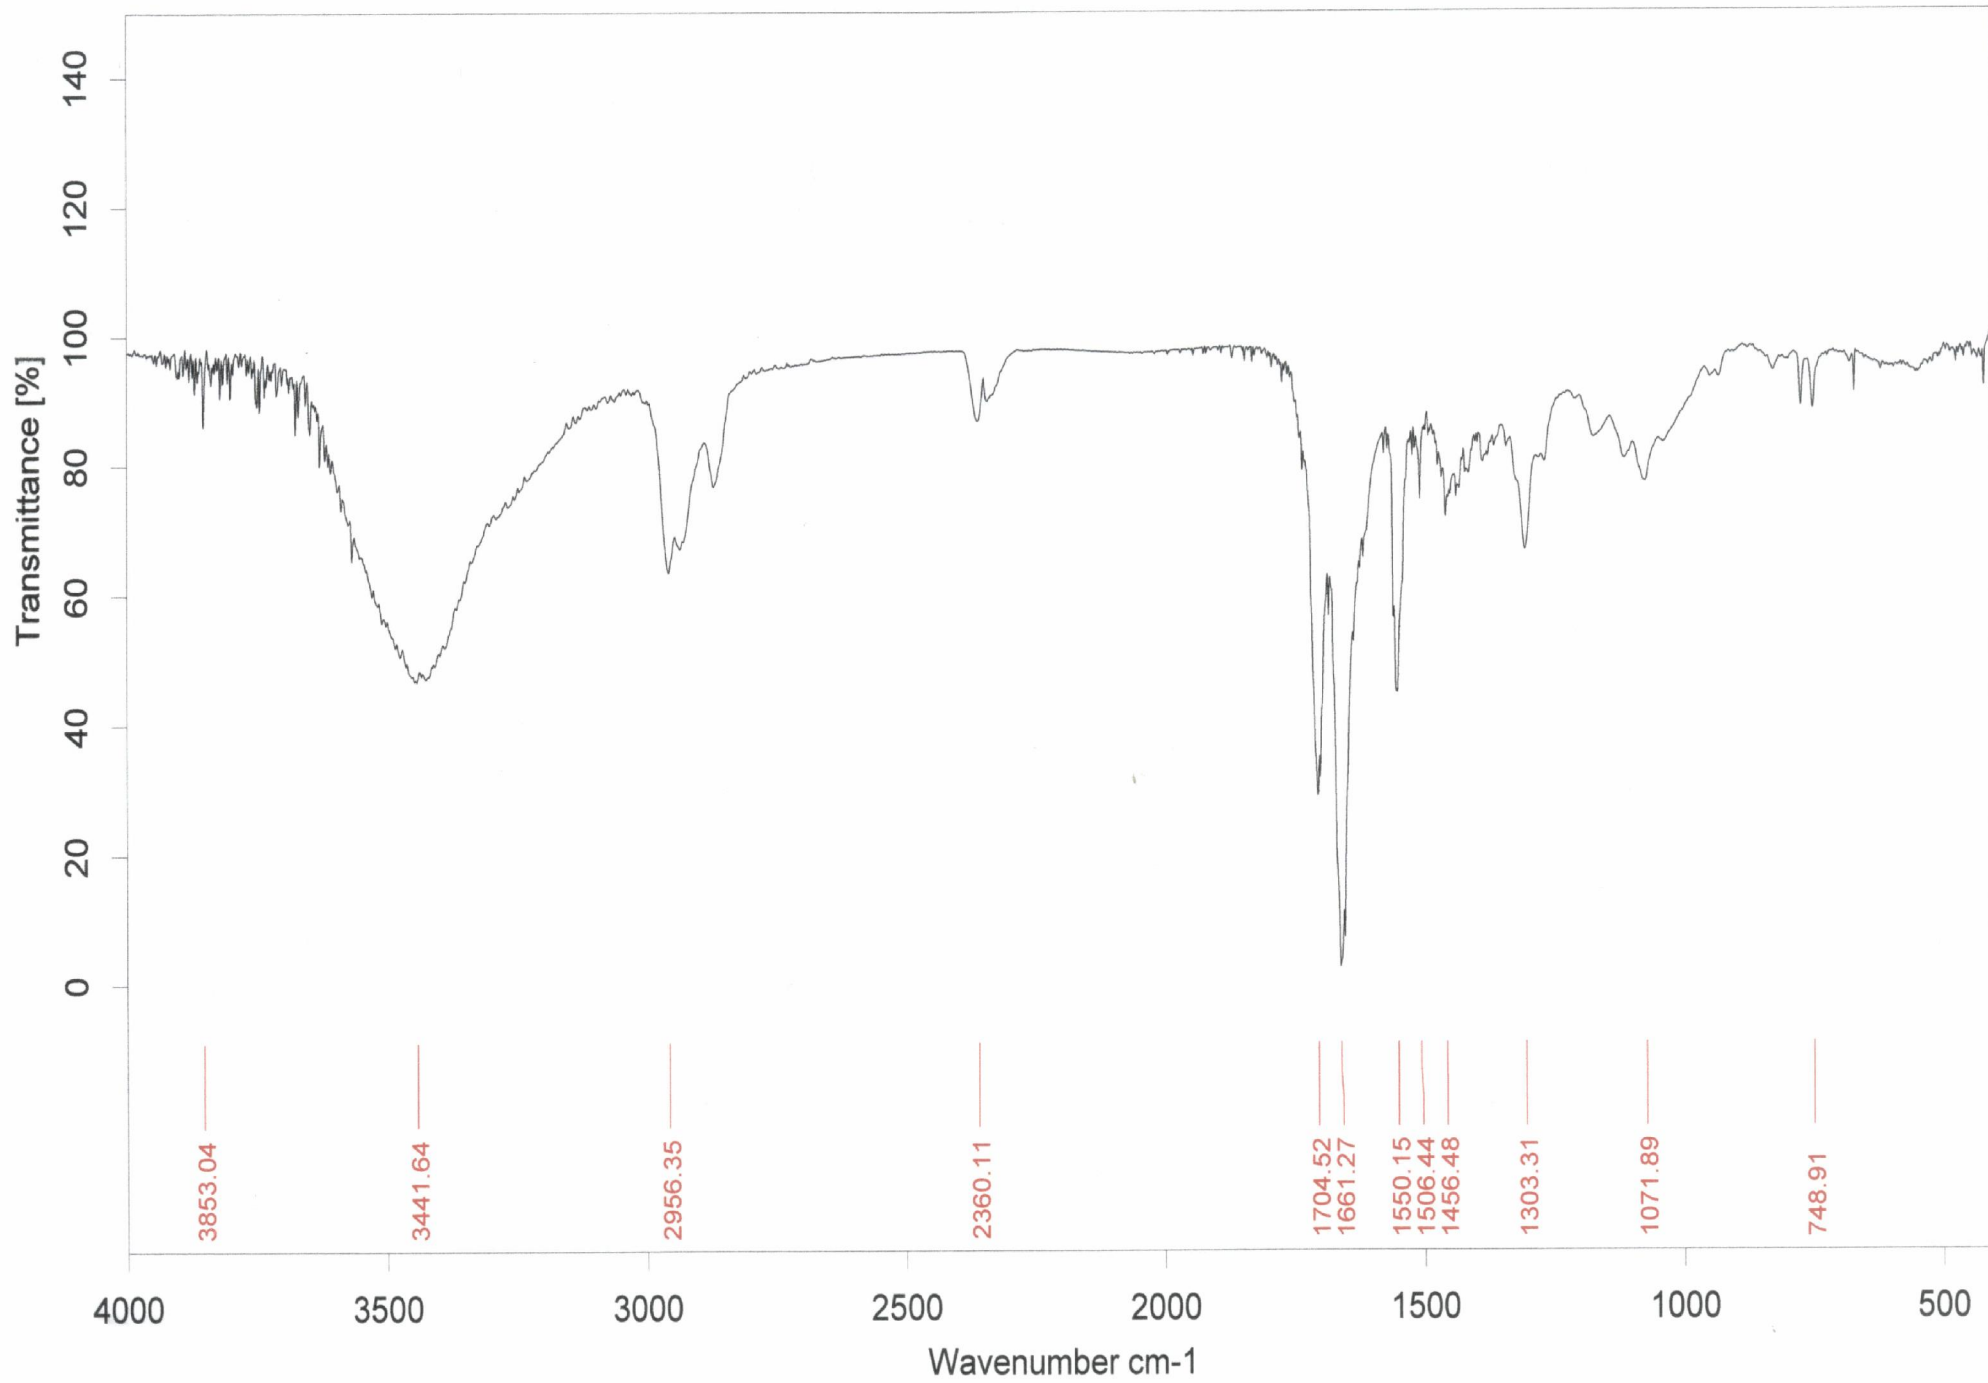

Supplement: Additional file 9 [file 1860-5397-2-20-S9.pdf]
